# Supplementary material for: Pre-clinical pharmacokinetic-pharmacodynamic modelling and biodistribution studies of donepezil hydrochloride by a validated HPLC method
Source: Royal Society of Chemistry journal article supplement (doi:10.1039/c8ra03379j), 2018-01-01
Supplement: c8ra03379j1.pdf [file c8ra03379j1.pdf]

## A Pre-Clinical Pharmacokinetic-Pharmacodynamic Modelling and Biodistribution Studies of Donepezil Hydrochloride by Validated HPLC Method

Kowthavarapu Venkata Krishna<sup>a</sup>, Ranendra Narayana Saha<sup>b</sup>, Gautam Singhvi, Sunil Kumar Dubey<sup>a\*</sup>

<sup>a</sup> Department of Pharmacy, Birla Institute of Technology and Science, Pilani (BITS-PILANI), Pilani Campus, Rajasthan, INDIA

<sup>b</sup> Department of Biotechnology, Birla Institute of Technology and Science, Pilani (BITS-PILANI), Dubai Campus, Dubai - United Arab Emirates

### Supplementary Data

Fig. S1

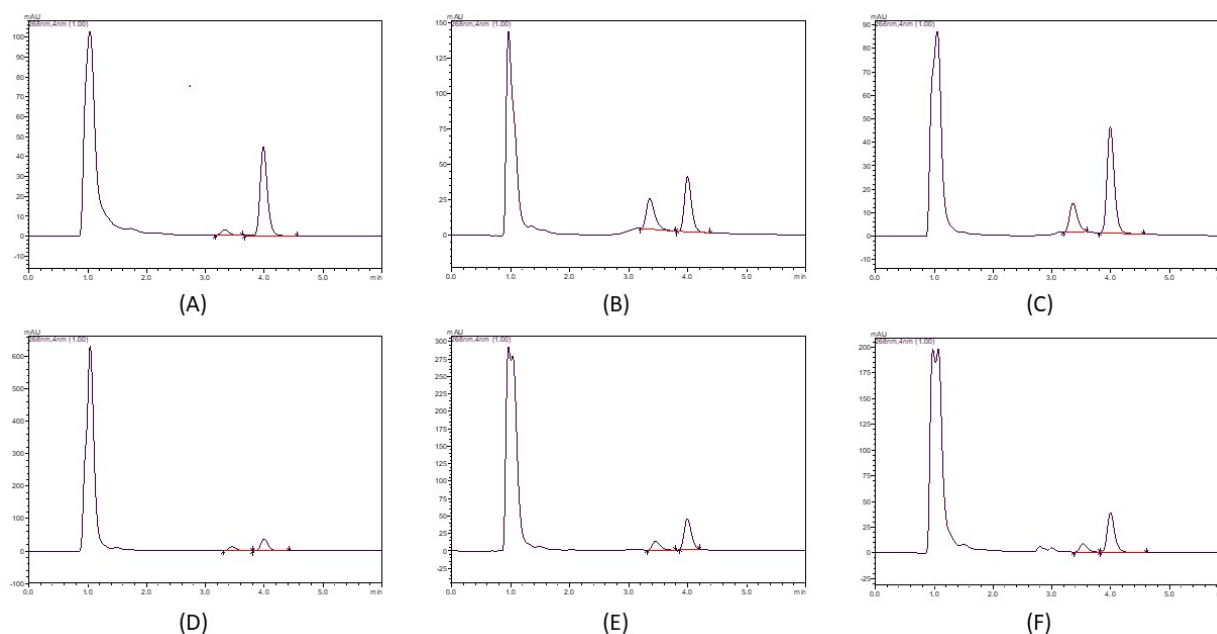

Fig. S1: Representative HPLC Chromatograms for (A) Brain (B) Spleen (C) Heart (D)Kidney (E) Lungs (F) Liver

**Table S1**

Solid phase extraction method for DNP

| <b>Procedure</b> | <b>Reagent</b> | <b>Flow rate (<math>\mu\text{L}/\text{min}</math>)</b> | <b>Volume (<math>\mu\text{L}</math>)</b> | <b>n</b> |
|------------------|----------------|--------------------------------------------------------|------------------------------------------|----------|
| Conditioning     | Methanol       | 4000                                                   | 1000                                     | 2        |
| Equilibration    | Milli Q water  | 4000                                                   | 1000                                     | 2        |
| Loading          | Sample         | 2000                                                   | 600                                      | 1        |
| Cartridge wash   | 1% Methanol    | 2000                                                   | 1000                                     | 1        |
| Elution          | Methanol       | 2000                                                   | 1000                                     | 2        |

n, number of times

**Table S2**

Method optimization: system suitability parameters obtained upon performing deliberate variations in the chromatographic conditions.

| Variations in Chromatographic condition | Effect on chromatographic parameters of analytes (n=6) |             |                      |             |               |              |                  |                  |                                       |
|-----------------------------------------|--------------------------------------------------------|-------------|----------------------|-------------|---------------|--------------|------------------|------------------|---------------------------------------|
|                                         | $t_R$ (min)                                            |             | Tailing factor (10%) |             | HETP          |              | N                |                  | $^{\text{f}}$ Resolution <sup>n</sup> |
|                                         | DNP                                                    | IS          | DNP                  | IS          | DNP           | IS           | DNP              | IS               |                                       |
| No variation ( $^{\text{y}}$ Optimized) | 3.31 ± 0.01                                            | 3.99 ± 0.01 | 1.05 ± 0.06          | 1.14 ± 0.04 | 69.96 ± 6.44  | 30.20 ± 1.09 | 2431.83 ± 143.65 | 4993.86 ± 187.30 | 2.88 ± 0.09                           |
| Flow rate (0.8 mL/min)                  | 4.25 ± 0.02                                            | 5.01 ± 0.01 | 1.22 ± 0.08          | 1.27 ± 0.01 | 75.22 ± 17.72 | 29.77 ± 0.27 | 2076.87 ± 175.78 | 5037.57 ± 46.35  | 2.30 ± 0.16                           |
| Flow rate (1.2 mL/min)                  | 2.80 ± 0.02                                            | 3.32 ± 0.01 | 1.28 ± 0.10          | 1.19 ± 0.02 | 86.25 ± 12.71 | 38.15 ± 0.45 | 1528.87 ± 219.47 | 3931.61 ± 47.57  | 1.49 ± 0.32                           |
| Mobile phase composition (60:40 % v/v)  | 3.49 ± 0.01                                            | 4.43 ± 0.02 | 1.22 ± 0.17          | 1.18 ± 0.01 | 68.71 ± 6.57  | 31.49 ± 0.28 | 2198.00 ± 209.92 | 4763.50 ± 43.90  | 3.35 ± 0.12                           |
| Mobile phase composition (64:36 % v/v)  | 3.18 ± 0.02                                            | 3.71 ± 0.18 | 1.15 ± 0.07          | 1.18 ± 0.02 | 82.25 ± 20.70 | 36.42 ± 0.32 | 1275.77 ± 172.56 | 4118.09 ± 34.34  | 1.46 ± 0.34                           |
| Column temperature (35 °C)              | 3.55 ± 0.04                                            | 4.08 ± 0.04 | 1.31 ± 0.09          | 1.28 ± 0.04 | 56.01 ± 11.94 | 34.40 ± 0.32 | 2772.14 ± 88.70  | 4360.73 ± 41.14  | 2.02 ± 0.02                           |
| Column temperature (45 °C)              | 3.33 ± 0.08                                            | 3.90 ± 0.02 | 1.36 ± 0.07          | 1.29 ± 0.02 | 45.71 ± 1.04  | 32.97 ± 0.38 | 2793.95 ± 61.73  | 4549.15 ± 53.31  | 2.36 ± 0.06                           |
| Buffer (pH:4.4)                         | 2.69 ± 0.12                                            | 3.99 ± 0.09 | 1.37 ± 0.09          | 1.24 ± 0.04 | 78.75 ± 2.39  | 33.44 ± 0.09 | 1921.48 ± 135.36 | 4485.23 ± 52.85  | 5.35 ± 0.08                           |
| Buffer (pH:8.4)                         | 3.53 ± 0.16                                            | 3.97 ± 0.11 | 1.34 ± 0.14          | 1.27 ± 0.09 | 48.75 ± 2.87  | 30.50 ± 0.95 | 3079.95 ± 244.04 | 4965.65 ± 31.81  | 1.89 ± 0.18                           |

$^{\text{y}}$ Optimized; Flow rate-1 mL/min, Mobile phase composition (62:38 % v/v), Column temperature (40 °C), Buffer pH (6.4)

$^{\text{f}}$ Resolution; Resolution factor for DNP and IS peak

$t_R$ , retention time; HETP, height equivalent to theoretical plate; N, number of theoretical plate

**Table S3**

Optimization of Solid-Phase Extraction (SPE) method for sample preparation.

| Extracting technique                                                                                                                                                                          | Extracting solvent                                    | Sample volume (μL) | Volume of extraction solvent added (mL) | Vortex time (min) | Centrifugation [speed (rpm), time (min)] | % Recovery | Remarks                                                                                                                          |
|-----------------------------------------------------------------------------------------------------------------------------------------------------------------------------------------------|-------------------------------------------------------|--------------------|-----------------------------------------|-------------------|------------------------------------------|------------|----------------------------------------------------------------------------------------------------------------------------------|
| Protein Precipitation (PP)                                                                                                                                                                    | Acetonitrile                                          | 200                | 3                                       | 5                 | 5000, 15                                 | 35-42%     | Poor recovery, interference of plasma was observed and inconsistent recovery                                                     |
| PP                                                                                                                                                                                            | Methanol                                              | 200                | 3                                       | 5                 | 5000, 15                                 | 40-49%     | Poor recovery, interference of plasma was observed and inconsistent recovery                                                     |
| Liquid-Liquid extraction (LLE)                                                                                                                                                                | Methylene chloride (DCM)                              | 200                | 3                                       | 5                 | 5000, 15                                 | 25-37 %    | Very poor recovery and high interference of plasma was observed                                                                  |
| LLE                                                                                                                                                                                           | n-hexane                                              | 200                | 3                                       | 5                 | 5000, 15                                 | 64-72 %    | Increase in the recovery of analyte was observed, but recovery was inconsistent and high plasma interference was observed        |
| LLE                                                                                                                                                                                           | n-hexane: IPA (97:3 v/v)                              | 200                | 3                                       | 5                 | 5000, 15                                 | 65-79 %    | Slight increase in the recovery of analyte was observed, but recovery was inconsistent and high plasma interference was observed |
| LLE                                                                                                                                                                                           | n-hexane: IPA (95:5 v/v)                              | 200                | 3                                       | 5                 | 5000, 15                                 | 68-78%     | Similar recovery of analyte was observed, but recovery was inconsistent and high plasma interference was observed                |
| Solid-Phase extraction (SPE)                                                                                                                                                                  | Acetonitrile                                          | 200                | 2                                       | 2                 | --                                       | 49-64%     | No interference of plasma proteins was observed but recovery was reduced                                                         |
| SPE                                                                                                                                                                                           | Methanol                                              | 200                | 2                                       | 2                 | --                                       | 70-78%     | Consistent recovery was observed, no interference of plasma proteins was observed                                                |
| SPE                                                                                                                                                                                           | Methanol: 10 mM Ammonium formate (pH:6.4) (90:10 v/v) | 200                | 2                                       | 2                 | --                                       | 66-72%     | Slight decrease in the recovery of analyte was observed, no interference of plasma proteins was observed                         |
| Based on the above results, SPE was selected as the extracting technique and methanol as solvent of choice for elution and other extraction conditions (sample volume) were further optimized |                                                       |                    |                                         |                   |                                          |            |                                                                                                                                  |
| SPE                                                                                                                                                                                           | Methanol                                              | 100                | 2                                       | 2                 | --                                       | 75-76 %    | LLOQ was high (in μg/mL)                                                                                                         |
| SPE                                                                                                                                                                                           | Methanol                                              | 200                | 2                                       | 2                 | --                                       | 77-79 %    | LLOQ was improved (in ng/mL)                                                                                                     |

---

300

2

2

--

**78-80%**

Consistent recovery and reproducible with no plasma interference,  
LOD was observed at 20 ng/mL, I.S. recovery was also good and  
consistent

---

**Table S4**

Regression parameters of the calibration curve generated for each weighting factor ( $w_i$ ) and their respective sum of the relative errors ( $\Sigma$  %RE)

| <i>Model (<math>w_i</math>)</i> | <i>b</i> | <i>a</i> | <i>r</i> <sup>2</sup> | $\Sigma$ %RE |
|---------------------------------|----------|----------|-----------------------|--------------|
| Unweighted                      | 0.000400 | -0.0114  | 0.9999                | -5.6094      |
| 1/var                           | 0.000383 | -0.0082  | 0.9997                | 3.9284       |
| 1/x <sup>2</sup>                | 0.000384 | -0.0088  | 0.9999                | 0.5904       |
| 1/x                             | 0.000382 | -0.0083  | 0.9995                | 0.7194       |
| 1/x <sup>1/2</sup>              | 0.000384 | -0.0093  | 0.9999                | 4.1923       |
| 1/y <sup>2</sup>                | 0.000380 | -0.0081  | 0.9993                | 0.7303       |
| 1/y                             | 0.000384 | -0.0087  | 0.9999                | 1.4182       |
| 1/y <sup>1/2</sup>              | 0.000384 | -0.0092  | 0.9999                | 3.2725       |

*b*, slope; *a*, constant; *r*<sup>2</sup>, regression co-efficient
